# Supplementary material for: Comparative phyloinformatics of virus genes at micro and macro levels in a distributed computing environment
Source: PubMed Central journal article supplement (PMC2259424; doi:10.1186/1471-2105-9-s1-s23), 2008-02-13

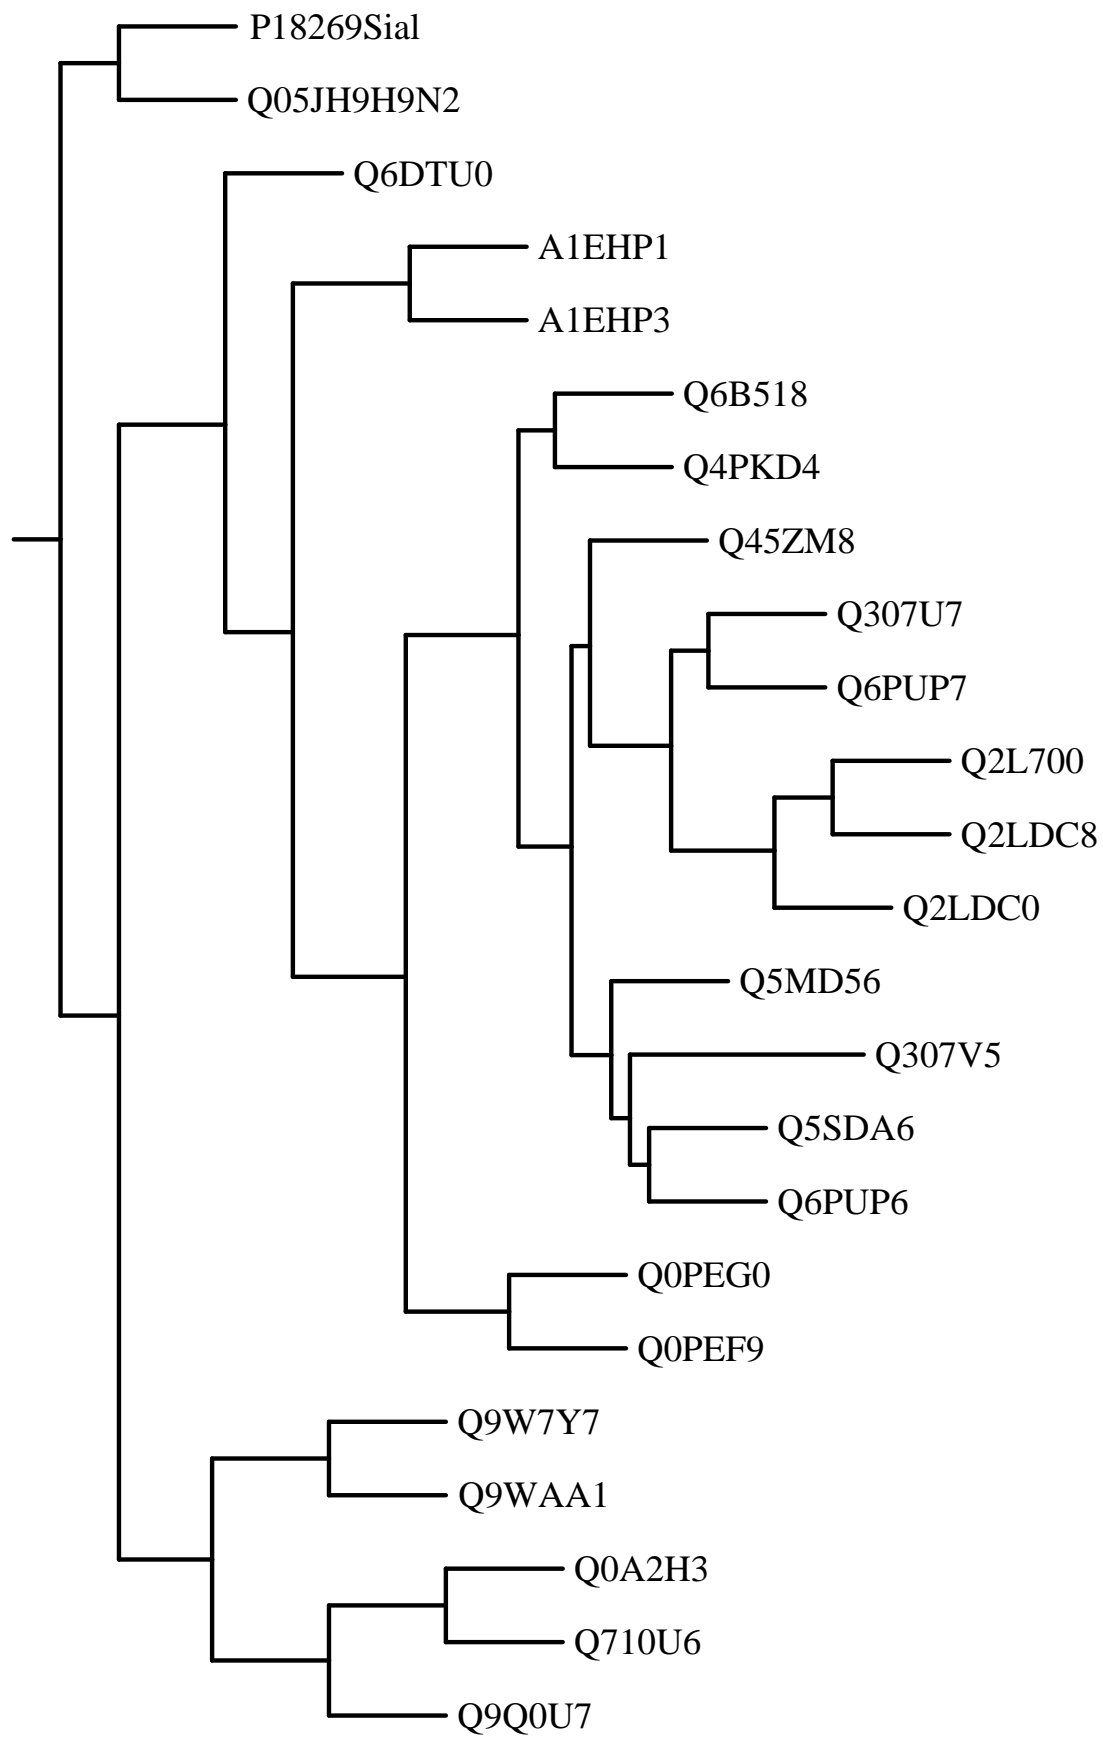

Supplement: 1471-2105-9-S1-S23-S4.pdf [file 1471-2105-9-S1-S23-S4.pdf]
